# Supplementary material
Source: MDPI journal article supplement (https://www.mdpi.com/2311-7524/9/4/475)
Supplement: s1 [file s1]

Table S1 The primer sequences used in qRT-PCR

| Gene                                          | Forward primer (5'-3')  | Reverse primer (5'-3')   |
|-----------------------------------------------|-------------------------|--------------------------|
| Actin                                         | TGACCGAATGAGCAAGGAAATTA | TACTCAGCTTTGGCAATCCACATC |
|                                               | CT                      |                          |
| MDP0000523487 ( <i>CHI</i> )                  | GCTACAAATGCGGTGATAG     | CGCCTCCACTACAACCTCC      |
| MDP0000607969 ( <i>DFR</i> )                  | TTGAATCCAAGGACCCCGAG    | CTTTTGGTGCTCCTCCACATTC   |
| MDP0000388769 ( <i>PAL</i> )                  | CGAGGAGTGTGACAAGGTGTTC  | AGGAATGCAGCATGTAAACCGTGA |
|                                               | A                       |                          |
| MDP0000240643 ( <i>ANS</i> )                  | GTTCTGTCACTTGGCTTGGG    | GGAGGATGAAGGTGAGTGCA     |
| MDP0000657441 ( <i>WRKY23</i> )               | GATGTGGTGAAGAGGGAGGA    | ACAGGGAAGTGGGACAACAG     |
| MDP0000686661 ( <i>CHS</i> )                  | TAGGCATCTCGGACTGGAAC    | GACACACGCACTTGACATGT     |
| MDP0000284922 ( <i>MYB-related 306-like</i> ) | TGATCCAGCAAATGCTTCAG    | CCTCAACTCGATCACAGCAA     |
| MDP0000140609 ( <i>MYB7</i> )                 | CATGACCACCAACAACAAGG    | CATTAGTCCCCCTGCATTTG     |
| MDP0000127691 ( <i>MYB1</i> )                 | CGGCTGAGGTGGTGTAAATC    | CTCTTGGCTCGGCAATAAG      |
| MDP0000758053 ( <i>MYB1R1</i> )               | GTCCGATCCCACTTCATCCT    | CTAGACATGGCCTGAAACGC     |
| MDP0000074681 ( <i>MYB1R1-like</i> )          | CAATCCATTGCCTGCTCCTC    | GTCATGGTGGGCTCAGTAGT     |

Table S2 Type and number of anthocyanins tested in this project

| N<br>O<br>. | Name                     | Class    | RT   | Equa<br>tion                     | LL<br>O<br>Q | U<br>L<br>O<br>Q | Q<br>1<br>(D<br>a) | Q<br>3<br>(D<br>a) | YS1        | YS2              | YS3           | YS4         | YR1         | YR2         | YR3         | YR4         | HS1         | HS2         | HS3         | HS4         | HR1         | HR2         | HR3         | HR4         |
|-------------|--------------------------|----------|------|----------------------------------|--------------|------------------|--------------------|--------------------|------------|------------------|---------------|-------------|-------------|-------------|-------------|-------------|-------------|-------------|-------------|-------------|-------------|-------------|-------------|-------------|
| 1           | Cyanidin-3-O-galactoside | Cyanidin | 6.89 | y = 2550.9742<br>8 x + 743.84466 | 5            | 5000             | 449.1              | 287.1              | 2.41680403 | 1705.24217       | 2715.983853   | 5326.661967 | 36.70366017 | 2298.43812  | 2010.726757 | 3478.426237 | 26.6289994  | 413.573935  | 609.3807043 | 2419.782317 | 6.339445693 | 121.8725117 | 935.4319287 | 1490.714583 |
| 2           | Cyanidin-3-O-arabinoside | Cyanidin | 7.86 | y = 1.05803e5<br>x + 9.08452e4   | 2            | 5000             | 419.1              | 287.1              | 26.9395810 | 173.553.98005873 | 0.36370993188 | 63.84463673 | 40.88960837 | 130.8014707 | 0.927008345 | 9.11343001  | 16.74434223 | 65.40174173 | 0.096229065 | 4.491036143 | 20.3395484  | 34.406431   |             |             |
| 3           | Cyanidin-3-O-xyloside    | Cyanidin | 9.64 | y = 6.97427e4<br>x + 6.06251e4   | 5            | 5000             | 419.1              | 287.1              | 0.05800778 | 35.96380077      | 66.55479137   | 180.726279  | 0.864402331 | 56.38430147 | 38.53602847 | 100.1923095 | 0.495484068 | 10.12807833 | 13.7644965  | 54.8474219  | 0.152599659 | 1.936452043 | 17.7630829  | 27.67031093 |
| 4           | Cyanidin-3-              | Cyanidin | 7.4  | y =                              | 5            | 50               | 44                 | 28                 | 0          | 0                | 13.08         | 51.43       | 0           | 12.79       | 9.690       | 33.30       | 0           | 0           | 0           | 21.55       | 0           | 0           | 0           | 0           |

[illegible]

|    |                              |              |      |                                |     |      |       |        |   |            |             |             |   |             |             |             |   |   |             |             |   |             |             |             |
|----|------------------------------|--------------|------|--------------------------------|-----|------|-------|--------|---|------------|-------------|-------------|---|-------------|-------------|-------------|---|---|-------------|-------------|---|-------------|-------------|-------------|
| 8  | Peonidin-3-O-arabinoside     | Peonidin     | 9.37 | y = 1.18209e5 x + 8.00277e4    | 2   | 5000 | 433.2 | 301.1  | 0 | 0.00810718 | 0.035836407 | 0.539397569 | 0 | 0.040858466 | 0.041091285 | 0.229422127 | 0 | 0 | 0.022817757 | 0.08899535  | 0 | 0.006724986 | 0.033778069 | 0.052526012 |
| 9  | Pelargonidin-3-O-arabinoside | Pelargonidin | 8.7  | y = 17671.41022 x - 7094.46550 | N/A | N/A  | 403.1 | 271.06 | 0 | 0          | 0           | 0.329387025 | 0 | 0.070632929 | 0.075310046 | 0.185404744 | 0 | 0 | 0           | 0           | 0 | 0           | 0           | 0           |
| 10 | Cyanidin-3-O-rutinoside      | Cyanidin     | 8.08 | y = 17671.41022 x - 7094.46550 | N/A | N/A  | 51.7  | 287.1  | 0 | 0.12337751 | 0.090298809 | 0.368671285 | 0 | 0.49530838  | 0.125129403 | 0.221357853 | 0 | 0 | 0           | 0.070857163 | 0 | 0           | 0           | 0           |
| 11 | Delphinidin-3-O-glucoside    | Delphinidin  | 6.43 | y = 6.68665e4 x + 13056.597    | 5   | 5000 | 465.1 | 303.1  | 0 | 0          | 0           | 0           | 0 | 0           | 0           | 0.311386889 | 0 | 0 | 0           | 0           | 0 | 0           | 0           | 0           |

|        |                             |             |      |                                    |     |       |          |        |               |              |               |     |               |     |               |     |               |               |     |                |               |     |     |  |
|--------|-----------------------------|-------------|------|------------------------------------|-----|-------|----------|--------|---------------|--------------|---------------|-----|---------------|-----|---------------|-----|---------------|---------------|-----|----------------|---------------|-----|-----|--|
|        |                             |             |      | 08                                 |     |       |          |        |               |              |               |     |               |     |               |     |               |               |     |                |               |     |     |  |
| 1<br>2 | Delphinidin-3-O-arabinoside | Delphinidin | 6.99 | y = 1767 1.410 22 x - 7094. 4655 0 | N/A | N/A   | 43 5.5   | 30 3.1 | 0.049 5997 48 | 0.031 0348 3 | 0.028 6384 58 | 0 0 | 0.045 8804 27 | 0 0 | 0.032 2073 66 | 0 0 | 0.026 8285 04 | 0.034 2106 22 | 0 0 | 0.036 0527 904 | 0.039 0 4     | 0 0 | 0 0 |  |
| 1<br>3 | Delphinidin-3-O-rutinoside  | Delphinidin | 7.02 | y = 3.677 95e4 x + 2284 8.445 83   | 5   | 50 00 | 77 3.2 1 | 30 3.1 | 0 0           | 0 0          | 0 0           | 0 0 | 0 0           | 0 0 | 0 0           | 0 0 | 0.005 2760 85 | 0.015 0372 49 | 0 0 | 0.002 1456 35  | 0.013 2991 62 |     |     |  |
| 1<br>4 | Delphinidin-3-O-galactoside | Delphinidin | 5.99 | y = 6.065 81e4 x + 1.040 06e5      | 5   | 50 00 | 46 5.1   | 30 3.1 | 0 0           | 0 0          | 0 0           | 0 0 | 0 0           | 0 0 | 0 0           | 0 0 | 0 0           | 0 0           | 0 0 | 0.091 9214 37  | 0 0           |     |     |  |
| 1<br>5 | Malvidin-3-O-sambubioside   | Malvidin    | 9.46 | y = 1767 1.410 22 x - 7094.        | N/A | N/A   | 62 5.1 9 | 33 1.1 | 0 0           | 0 0          | 0 0           | 0 0 | 0 0           | 0 0 | 0 0           | 0 0 | 0.036 4953 14 | 0 0           | 0 0 | 0 0            | 0 0           | 0 0 | 0 0 |  |

|        |                                                      |          |           |                                                      |                    |                |           |        |        |                     |                     |        |                     |                     |                     |        |        |        |                     |        |        |                     |                     |  |
|--------|------------------------------------------------------|----------|-----------|------------------------------------------------------|--------------------|----------------|-----------|--------|--------|---------------------|---------------------|--------|---------------------|---------------------|---------------------|--------|--------|--------|---------------------|--------|--------|---------------------|---------------------|--|
|        |                                                      |          |           | 4655<br>0                                            |                    |                |           |        |        |                     |                     |        |                     |                     |                     |        |        |        |                     |        |        |                     |                     |  |
| 1<br>6 | Peonidin-3-<br>O-glucoside                           | Peonidin | 8.9<br>7  | y =<br>1.751<br>34e5<br>x +<br>1.330<br>17e5         | 2<br>50<br>00      | 46<br>3.3      | 30<br>1.1 | 0<br>0 | 0<br>0 | 0.019<br>1829<br>82 | 0.147<br>7188<br>11 | 0<br>0 | 0.005<br>9882<br>09 | 0.006<br>5814<br>85 | 0.023<br>2783<br>65 | 0<br>0 | 0<br>0 | 0<br>0 | 0.073<br>0577<br>51 | 0<br>0 | 0<br>0 | 0.006<br>1351<br>78 | 0.026<br>2589<br>26 |  |
| 1<br>7 | Peonidin-3-<br>O-(6-O-p-co<br>umaroyl)-gl<br>ucoside | Peonidin | 12.<br>52 | y =<br>1767<br>1.410<br>22 x -<br>7094.<br>4655<br>0 | N/<br>A<br>N/<br>A | 60<br>9.1<br>6 | 30<br>1.1 | 0<br>0 | 0<br>0 | 0<br>0              | 0<br>0              | 0<br>0 | 0<br>0              | 0<br>0              | 0<br>0              | 0<br>0 | 0<br>0 | 0<br>0 | 0.183<br>5969<br>89 | 0<br>0 | 0<br>0 | 0<br>0              |                     |  |

Note: LLOQ and ULOQ represent the lowest concentration and the highest concentration of the corresponding substance detected in the sample respectively. The substance with LLOQ and ULOQ value were quantified through the retention time (RT) and Q1, Q3 value of standard sample, and substances without values were semi quantitative. Semi quantitative analysis was mainly based on the fragmentation mode of mass spectrometry and the peak rule of liquid phase of substances with standards. Q1, Relative molecular mass of original ion. Q3, Relative molecular mass of the characteristic fragment after cleavage. The unit of anthocyanin content was µg/g. YS, Huashuo; YR, Huarui.

Table S3 Statistics of all sample quality control data

| Sample | Total Reads | Total Bases | Average Read | Q20 Bases | Q30 Bases | GC Bases  |
|--------|-------------|-------------|--------------|-----------|-----------|-----------|
| NO.    | Count       | Count (bp)  | Length (bp)  | Ratio (%) | Ratio (%) | Ratio (%) |
| 1      | 50939656.67 | 7145200980  | 140.32       | 97.48%    | 90.48%    | 47.11%    |
| 2      | 58922644.00 | 8273328673  | 140.41       | 97.94%    | 92.51%    | 46.91%    |
| 3      | 50589868.67 | 7127723224  | 141.1333333  | 97.88%    | 91.64%    | 47.29%    |
| 4      | 62619902.67 | 8786949099  | 140.3033333  | 98.28%    | 93.58%    | 46.86%    |
| 5      | 48690526.67 | 6875857480  | 141.2066667  | 97.33%    | 90.00%    | 47.39%    |
| 6      | 57012886.00 | 8029186252  | 140.81       | 98.17%    | 93.22%    | 47.02%    |
| 7      | 55532436.67 | 7754430281  | 139.5833333  | 97.94%    | 92.38%    | 47.09%    |
| 8      | 61891340.67 | 8466435258  | 137.0066667  | 98.31%    | 93.76%    | 47.68%    |
| 9      | 63498018.67 | 8887962070  | 139.99       | 98.01%    | 92.74%    | 47.23%    |
| 10     | 53440447.33 | 7431283743  | 139.02       | 98.25%    | 93.49%    | 46.64%    |
| 11     | 55905295.33 | 7819888806  | 139.9233333  | 98.13%    | 93.11%    | 47.11%    |
| 12     | 58483802.67 | 8241588138  | 140.92       | 98.24%    | 93.50%    | 46.87%    |
| 13     | 59403900.00 | 8330053551  | 140.2633333  | 98.11%    | 93.05%    | 47.29%    |
| 14     | 48662867.33 | 6880553146  | 141.3433333  | 98.23%    | 93.47%    | 47.28%    |
| 15     | 56215815.33 | 7915404767  | 140.7933333  | 98.17%    | 93.21%    | 46.61%    |
| 16     | 59272514.67 | 8332149512  | 140.5766667  | 98.21%    | 93.37%    | 46.85%    |

Note: 1-4 sequential represent YS1-4, 5-8 sequential represent YR1-4, 9-12 sequential represent HS1-4, 13-16 sequential represent HR1-4. YS, Huashuo; YR, Huarui.

Table S4 Hormones related to anthocyanin accumulation

|       | ID            | Annotation                                 | Accession         | PCC         |
|-------|---------------|--------------------------------------------|-------------------|-------------|
| ABA   | MDP0000058337 | HYR1 (UDP glycosyltransferase)             | at3g21760         | 0.717/0.798 |
|       | MDP0000715898 | HYR1 (UDP glycosyltransferase)             | at3g21761         | 0.714/0.798 |
|       | MDP0000307237 | HYR1 (UDP glycosyltransferase)             | at3g21762         | 0.763       |
|       | MDP0000929213 | NCED5 (9-cis-epoxycarotenoid dioxygenase5) | at1g30100         | 0.722/0.725 |
|       | MDP0000774924 | NCED4 (9-cis-epoxycarotenoid dioxygenase4) | at4g19170         | -0.764      |
| auxin | MDP0000281064 | ILR1( IAA-LEUCINE RESISTANT 1)             | at3g02875         | 0.79/0.743  |
|       | MDP0000125975 | TIR1 (TRANSPORT INHIBITOR RESPONSE 1)      | at3g62980         | -0.714      |
|       | MDP0000175425 | AUX1-like protein 2 (auxin influx          | q9fel7 lax2_medtr | -0.706      |

|     |                |                                                                          |                            |                        |
|-----|----------------|--------------------------------------------------------------------------|----------------------------|------------------------|
|     |                | transporter)                                                             |                            |                        |
|     | MDP0000203334  | auxin signaling F-box 3 (AFB3)                                           | at1g12820                  | -0.753/-0.791/-0.72    |
|     | MDP0000469943  | auxin signaling F-box 2 (AFB2)                                           | at3g26810                  | -0.747                 |
|     | MDP0000666539  | GH3 auxin-responsive promoter                                            | at2g14960                  | 0.737                  |
|     | MDP0000287459  | NAD(P)-linked oxidoreductase superfamily protein                         | at1g60690                  | 0.737                  |
|     | MDP0000273979  | O-fucosyltransferase family protein                                      | at1g76270                  | 0.71                   |
|     | MDP0000612130  | ATB2(NAD(P)-linked oxidoreductase superfamily protein)                   | at1g60710                  | 0.83                   |
|     | MDP0000873893  | GH3 (Auxin-responsive GH3 family protein)                                | at2g14960                  | 0.723                  |
|     | MDP0000586656  | auxin-responsive family protein                                          | at4g17280                  | 0.725                  |
|     | MDP0000157110  | outer arm dynein light chain 1 protein                                   | at2g34680                  | -0.742                 |
| BR  | MDP0000213283  | the cytochrome p450 family                                               | at2g26710                  | 0.73                   |
|     | MDP0000297861  | equalene monooxygenase                                                   | o48651 erg1_pangi          | -0.705/-0.707          |
|     | MDP0000260827  | no description available                                                 | gnl cdd 36512              | -0.726                 |
|     | MDP0000746652  | equalene monooxygenase                                                   | o48651 erg1_pangi: 715.0   | 0.7                    |
|     | MDP0000161955  | equalene monooxygenase                                                   | o48651 erg1_pangi: 760.0   | 0.736                  |
|     | MDP0000202883  | equalene monooxygenase                                                   | o48651 erg1_pangi: 734.0   | 0.738                  |
|     | MDP0000191389  | equalene monooxygenase                                                   | o48651 erg1_pangi: 758.0   | 0.708                  |
| CTK | MDP0000133146' | UDP-glucosyl transferase 85A2 (UGT85A2)                                  | at1g22360                  | 0.734/0.707/0.711/0.73 |
|     | MDP0000202898  | UDP-glucosyl transferase 76E2 (UGT76E2)                                  | at5g59590                  | 0.792                  |
|     | MDP0000780011  | UDP-glucosyl transferase 85A2 (UGT85A2)                                  | at1g22360                  | 0.703                  |
|     | MDP0000523619  | UDP-Glycosyltransferase superfamily protein                              | at3g55700                  | 0.713                  |
|     | MDP0000145813  | UDP-Glycosyltransferase superfamily protein                              | at3g55700                  | 0.723                  |
| ETH | MDP0000195885  | 1-aminocyclopropane-1-carboxylate oxidase 1                              | q00985 acco1_maldo : 586.0 | 0.745                  |
|     | MDP0000257135  | ethylene receptor                                                        | at2g40940 : 827.0          | 0.709                  |
|     | MDP0000226115  | ethylene-responsive transcription factor 2                               | q40479 erf2_tobac : 175.0  | 0.769/0.706/0.707      |
|     | MDP0000689946  | ethylene response factor                                                 | at5g47220                  | 0.805/0.723            |
|     | MDP0000129942  | multi-protein bridging factor 1                                          | at3g24500                  | 0.711                  |
| GA  | MDP0000899351  | 2-oxoglutarate                                                           | at1g52800                  | 0.715                  |
|     | MDP0000185333  | gibberellin 2-beta-dioxygenase 1                                         | q9sq80 g2ox1_pea : 474.0   | 0.794                  |
|     | MDP0000181482  | DELLA protein GAI                                                        | q84tq7 gai_goshi : 786.0   | -0.705                 |
|     | MDP0000319522  | GA receptor gene                                                         | at3g63010 : 530.0          | 0.78                   |
| JA  | MDP0000450991  | Lipoxygenase 1                                                           | p37831 lox1_soltu : 1206.0 | 0.719                  |
| SA  | MDP0000455611  | S-adenosyl-L-methionine-dependent methyltransferases superfamily protein | gnl cdd 86349 : 336.0      | 0.743/0.787            |
|     | MDP0000312765  | S-adenosyl-L-methionine-dependent methyltransferases superfamily protein | gnl cdd 86349 : 321.0      | 0.768                  |



|  |               |                                                                          |                       |             |
|--|---------------|--------------------------------------------------------------------------|-----------------------|-------------|
|  | MDP0000305536 | S-adenosyl-L-methionine-dependent methyltransferases superfamily protein | gnl cdd 86349 : 336.0 | 0.729/0.769 |
|  | MDP0000150382 | UDP-glycosyltransferase                                                  | at2g43820             | 0.795       |

Table S5 Main transcription factors information

| Category    | Gene ID              | Number of anthocyanin species (>0.7) | Correlation coefficient |
|-------------|----------------------|--------------------------------------|-------------------------|
| bHLH        | MDP0000261874        | 1, 2, 3, 6, 8                        | -0.710                  |
|             | MDP0000312274        | 6, 8                                 | 0.740                   |
|             | MDP0000212411        | 7                                    | -0.730                  |
|             | MDP0000644807        | 8, 16                                | 0.710                   |
|             | MDP0000137325        | 5                                    | -0.720                  |
| MYB         | <b>MDP0000127691</b> | 4                                    | 0.760                   |
|             | <b>MDP0000284922</b> | 1, 4, 3, 5, 6, 8                     | -0.750                  |
|             | <b>MDP0000758053</b> | 5                                    | 0.700                   |
| MYB-Related | MDP0000074681        | 1, 2, 3, 5, 6, 8                     | 0.780                   |
|             | MDP0000191083        | 7                                    | -0.740                  |
|             | MDP0000257129        | 8                                    | 0.720                   |
| WRKY        | <b>MDP0000792088</b> | 8                                    | 0.730                   |
|             | MDP0000794439        | 8                                    | 0.720                   |
|             | MDP0000767097        | 2                                    | 0.770                   |
|             | MDP0000759299        | 3, 7, 8                              | -0.713                  |
|             | MDP0000242979        | 8                                    | 0.743                   |
| AP2/EREBP   | MDP0000316694        | 8                                    | 0.755                   |
|             | MDP0000189347        | 2                                    | 0.750                   |
|             | MDP0000390121        | 8                                    | 0.708                   |
| ARF         | MDP0000139073        | 7                                    | -0.756                  |
|             | MDP0000194603        | 7                                    | -0.752                  |
|             | MDP0000713113        | 8                                    | -0.725                  |
| C2C2        | MDP0000429215        | 7                                    | -0.739                  |
|             | MDP0000221444        | 5                                    | 0.721                   |
|             | MDP0000331808        | 7                                    | 0.700                   |
| C2H2        | MDP0000141403        | 7                                    | -0.705                  |
|             | MDP0000551046        | 4                                    | -0.706                  |
|             | MDP0000610922        | 7                                    | 0.754                   |
| C3H         | MDP0000275117        | 6                                    | -0.718                  |
|             | MDP0000314593        | 8                                    | -0.703                  |
| HAP         | MDP0000818967        | 8                                    | -0.748                  |
|             | MDP0000190029        | 4                                    | 0.705                   |
| G2-like     | MDP0000182154        | 8                                    | -0.724                  |
| GRAS        | MDP0000181482        | 7                                    | -0.705                  |
|             | MDP0000736852        | 6                                    | -0.733                  |
|             | MDP0000596661        | 4                                    | -0.771                  |
| HB          | MDP0000316497        | 8                                    | 0.714                   |
|             | MDP0000222305        | 4                                    | 0.797                   |
|             | MDP0000319456        | 2                                    | 0.753                   |
| HSF         | MDP0000202716        | 6                                    | 0.704                   |
|             | MDP0000692406        | 1                                    | -0.725                  |
| TCP         | MDP0000193947        | 8                                    | 0.773                   |
|             | MDP0000156139        | 4                                    | -0.712                  |
|             | MDP0000881409        | 6                                    | 0.739                   |
| AS2         | MDP0000136037        | 2                                    | 0.871                   |
|             | MDP0000793302        | 7                                    | -0.733                  |
|             | MDP0000225062        | 2                                    | -0.741                  |

|               |   |        |
|---------------|---|--------|
| MDP0000127989 | 1 | -0.704 |
| MDP0000242236 | 7 | -0.705 |
| MDP0000131550 | 6 | 0.701  |
| MDP0000143447 | 7 | -0.712 |
| MDP0000242107 | 7 | -0.738 |
| MDP0000792734 | 2 | -0.715 |
| MDP0000197091 | 8 | -0.751 |
| MDP0000220601 | 7 | -0.719 |
| MDP0000202290 | 7 | -0.707 |
| MDP0000473750 | 8 | 0.754  |
| MDP0000526829 | 7 | -0.807 |

Note: Anthocyanin category No. refer to table 2
