# Supplementary material
Source: MDPI journal article supplement (https://www.mdpi.com/2311-7524/9/4/475)
Supplement: s1 [file s1]

Archive with 2 entries (2 files):
- Figure S1-S7.pdf
- Table S1-S5.pdf
